# Supplementary material
Source: PubMed Central journal article supplement (PMC3934715)

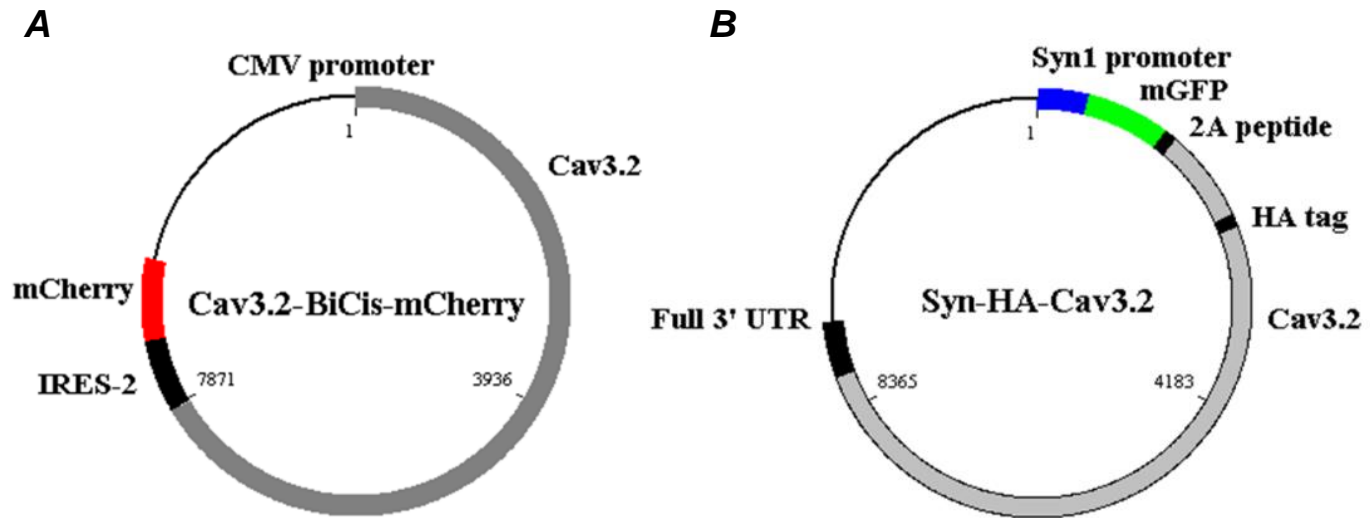

**Supplementary figure 1: Maps of the plasmids engineered for this study.**

*A*, map of the plasmid used for the electrophysiology recordings. The plasmid contains a CMV promoter driving the channel cDNA and mCherry separated by IRES-2 (Clontech). *B*, map of the plasmid used for the trafficking experiments. This plasmid used a fragment of the human synapsin-1 promoter to drive expression of GFP and the channel separated by a 2A peptide bridge.

**A**

|                             |                                    |
|-----------------------------|------------------------------------|
| Ca <sub>v</sub> 1.1         | FDNVLSAMMSLFTVST <u>FE</u> GWPQLLY |
| Ca <sub>v</sub> 1.1-SKEIIIK | FDNVLSAMMSLFTVST <u>FK</u> GWPQLLY |
| Ca <sub>v</sub> 3.2         | FDNLGQALMSLFVLSS <u>KD</u> GWVNIMY |
| Ca <sub>v</sub> 3.2-D1504K  | FDNLGQALMSLFVLSS <u>KK</u> GWVNIMY |

**B**

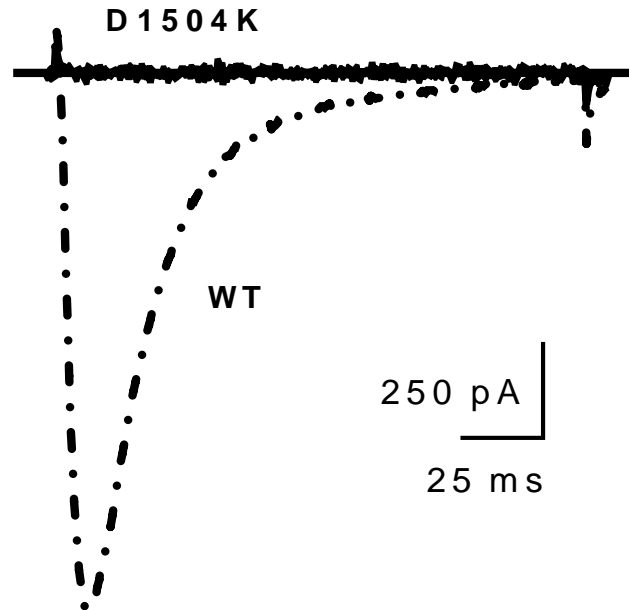

**Supplemental figure 2: Characterization of the non-conducting mutant.** A, alignment of the human Ca<sub>v</sub>1.1 and Ca<sub>v</sub>3.2 channels and the respective mutants SKEIIIK (Dirksen *et al.*, 1999) and D1504K. Underlining highlights the amino acids that are altered in the mutated channels. B, representative current traces from transfected HEK-293 cells showing the absence of currents in the D1504K mutant.

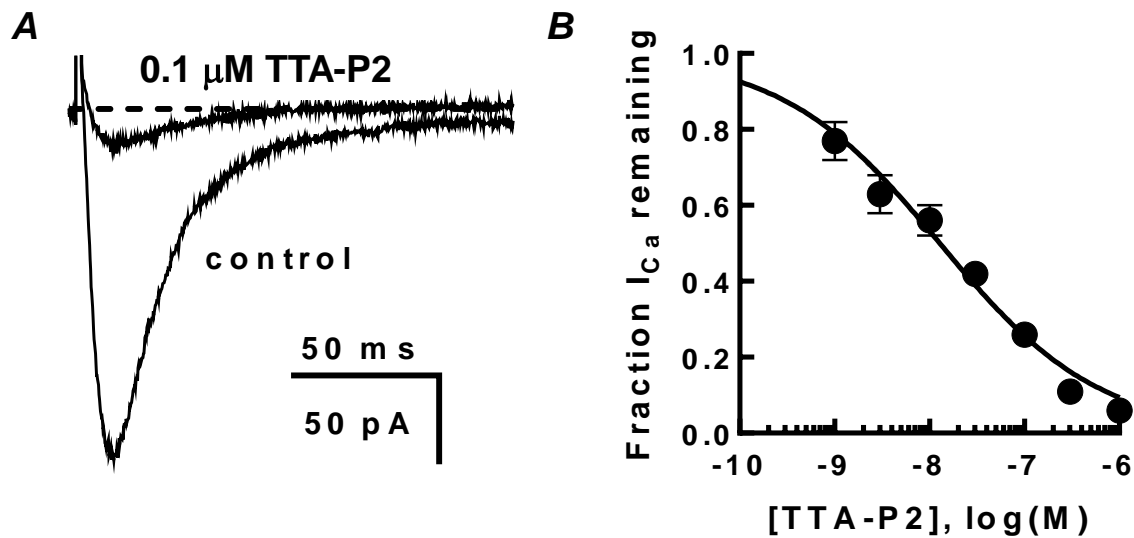

**Supplemental figure 3: Potency of TTA-P2 at blocking recombinant  $\text{Ca}_v3.2$  currents in HEK-293 cells.** *A*, representative traces showing the effect of the selective T-type channel blocker TTA-P2 for control and after wash-in of 0.1  $\mu\text{M}$  TTA-P2. *B*, TTA-P2 efficiently blocked T-type current in HEK-293 cells expressing recombinant  $\text{Ca}_v3.2$  channels. The apparent  $\text{IC}_{50}$  was 13 nM.

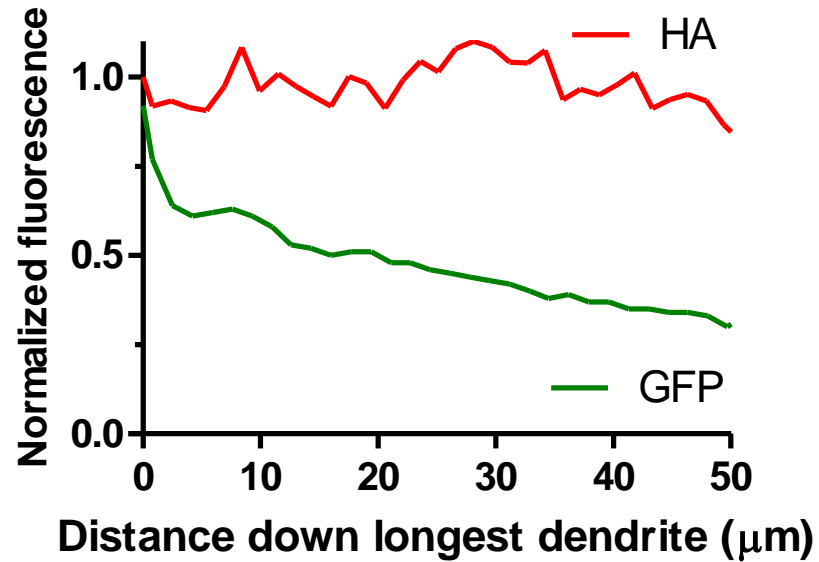

**Supplementary figure 4: Trafficking of GFP and the T-channel into the main dendrite differ.** The peak of the GFP signal was found at the cell body and decayed down the length of the dendrite. In contrast, HA-tagged channels labeled with a red fluorophore displayed a non-decaying signal along the dendrite. This provides evidence the two proteins were expressed independently.

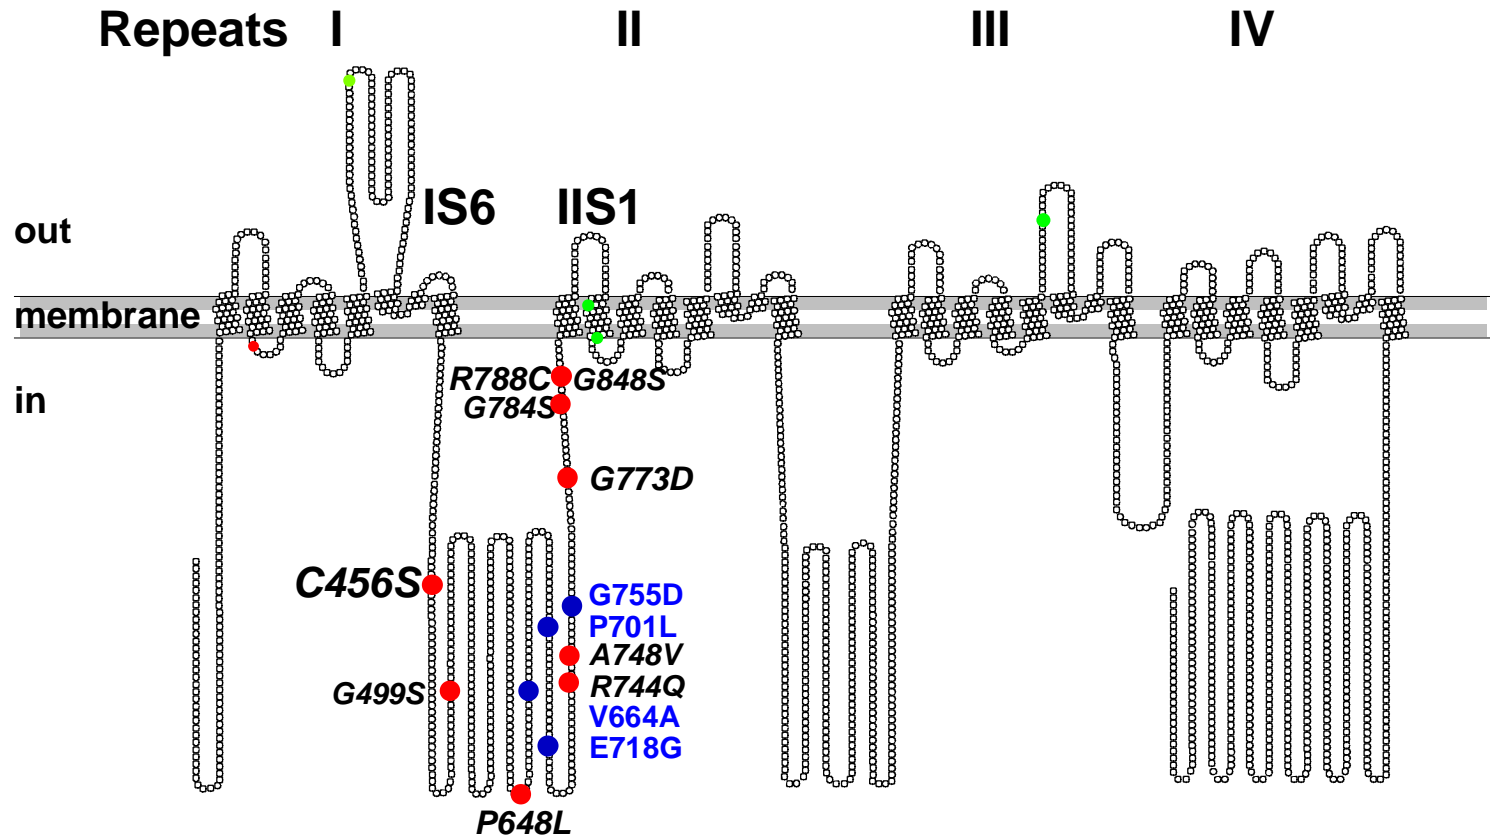

**Supplemental figure 5. Location of the CAE variants.** The Ca<sub>v</sub>3.2 channel is illustrated with every amino acid represented with a circle. The location of the mutations found in the I-II intracellular loop are highlighted as follows: mutations found in Chinese CAE patients are shown in black (Chen *et al.*, 2003); while mutations found only in idiopathic epilepsy patients in the Baylor Ion Channel Project are shown in blue (Klassen *et al.*, 2011). The deletion mutants removed the following amino acids: D1, 429-452; D2, 453-491; D3, 493-539; D4, 540-618; and D5, 619-772 (Vitko *et al.*, 2007). The amino acids mutated in the AARA mutant are Y479A, R481A, and W482A.

**Supplemental figure 6:** The AARA variant expressed in HEK-293 cells had little or no effect on channel biophysics. *A*, Average IV relationships normalised to cell capacitance using during depolarising voltage steps from -80 to -10 mV (holding potential -100 mV) in WT and AARA. (n= 23, WT; 19, AARA). Error bars are omitted for clarity. *B*, IV data were normalised to the maximum inward current in each cell and then averaged. *C*, the normalised amplitude obtained during a 20 ms test pulse to -20 mV preceded by incremental hyperpolarising pulses (15 s) from -80 mV. *D*, the conductance normalised to current density was slightly reduced in AARA compared to WT. *E*, activation time did not differ between WT and AARA. *F*, the inactivation time was slower in AARA compared to WT condition. Statistical significance at  $P < 0.05$  with a single asterisk and at  $P < 0.001$  with a triple asterisk, Student's t-test.

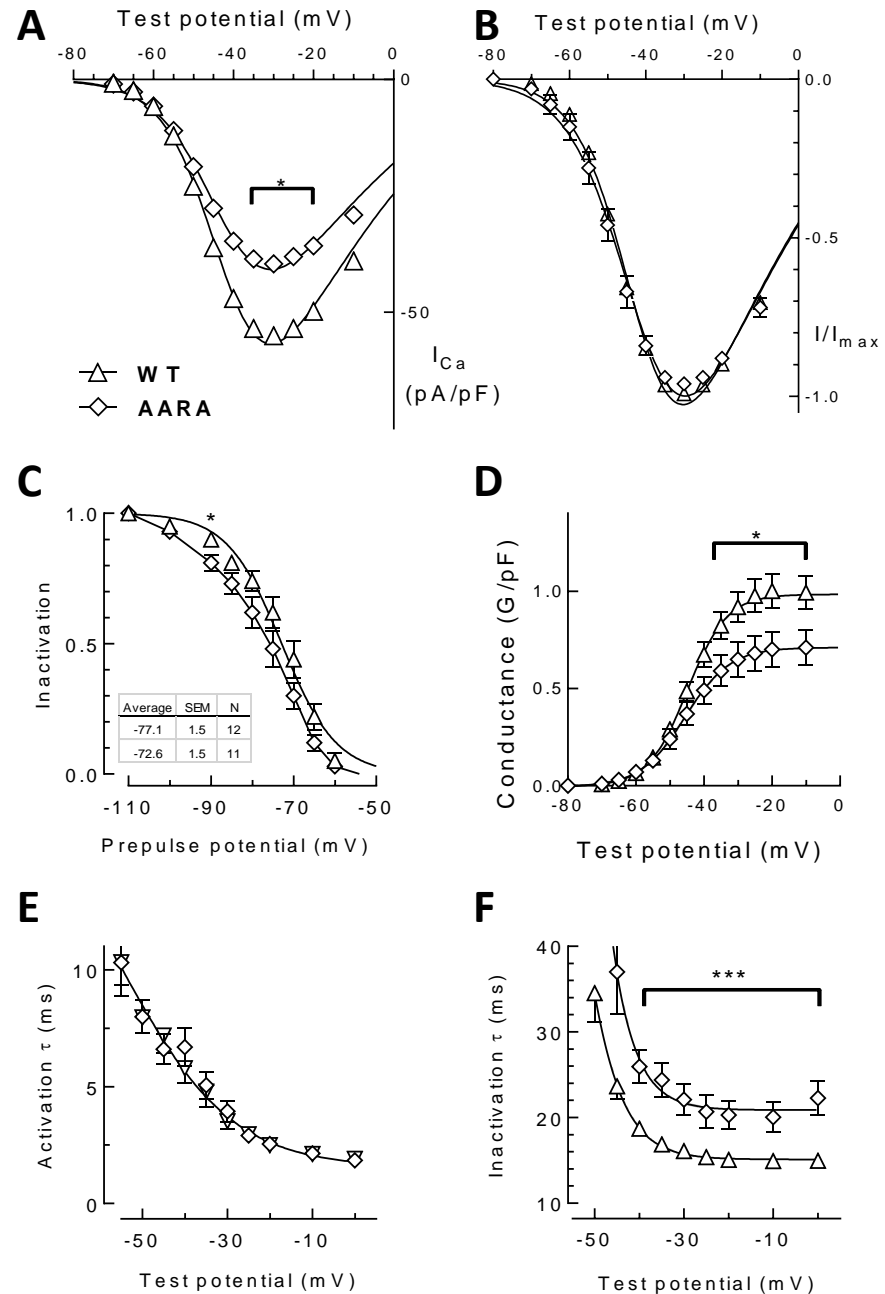

Supplement: tjp0592-0795-sd1.pdf [file tjp0592-0795-sd1.pdf]
